# Supplementary material for: Fin whale singing decreases with increased swimming speed
Source: R Soc Open Sci. 2019 Jun 5;6(6):180525. doi: 10.1098/rsos.180525 (PMC6599786; doi:10.1098/rsos.180525)
Supplement: Table S1. Listing of data for each of the 163 singer tracks [file rsos180525supp1.csv]

?Track #	Unique Whale ID			Start Date	Start Time	Number of Locations	Number of Songs	Track Length (km)	Track Duration (h)	Mean Track Speed (kph)	Speed s.d. (kph)	Max. Track Speed (kph)	Min. Track Speed (kph)	Mean Track DC (%)	DC s.d. (%)	Max DC (%)	Min DC (%)	Total Singing Duration (h)	Mean Song Duration (h)	Mean Song Duration (min)	Song Duration s.d. (h)	Max. Song Duration (h)	Min. Song Duration (h)	Mean Inter-song Gap (h)	Inter-song Gap s.d. (h)	Max. Song Gap (h)	Min. Song Gap (h)
156	2009Apr_Fin-03	Apr		24-Apr-09	3:13:30	6	9	33.25	5.38	6.18	2.211	9.0	4	14.60	13.594	27.00	0.00	5.39	0.172	10.333	0.0765	0.297	0.060	0.480	0.484	1.512	0.032
157	2009Apr_Fin-05	Apr		24-Apr-09	4:56:18	3	6	10.19	1.57	6.51	1.427	7.5	6	54.00	6.081	58.30	49.70	1.64	0.146	8.750	0.1171	0.292	0.010	0.154	0.115	0.328	0.045
158	2009Apr_Fin-04	Apr		24-Apr-09	11:43:06	7	21	53.99	8.41	6.42	2.013	9.4	4	59.78	32.563	88.00	0.00	8.58	0.173	10.362	0.0860	0.387	0.017	0.248	0.872	3.947	0.020
159	2009Apr_Fin-06	Apr		26-Apr-09	5:52:24	10	58	114.13	31.27	3.65	1.466	5.7	1	33.11	39.368	79.00	0.00	31.34	0.107	6.395	0.0363	0.220	0.012	0.441	1.487	8.037	0.015
160	2009Apr_Fin-02	Apr		26-Apr-09	13:54:48	30	100	290.49	60.25	4.82	1.175	6.8	2	49.89	41.310	92.70	0.00	60.39	0.265	15.899	0.0777	0.365	0.010	0.342	0.904	4.087	0.025
161	2009Apr_Fin-08	Apr		27-Apr-09	14:25:36	4	21	72.23	12.30	5.87	2.825	9.0	3	28.10	48.671	84.30	0.00	15.39	0.159	9.524	0.0604	0.285	0.030	0.603	1.635	6.157	0.025
162	2009Apr_Fin-07	Apr		27-Apr-09	15:34:00	28	97	263.36	43.49	6.06	2.549	12.7	3	28.12	30.302	78.70	0.00	44.01	0.130	7.798	0.0338	0.195	0.015	0.327	0.600	3.207	0.025
163	2009Apr_Fin-09	Apr	8	27-Apr-09	17:10:12	7	45	109.01	13.61	8.01	0.889	9.4	7	60.68	31.431	79.70	0.00	13.72	0.114	6.844	0.0287	0.183	0.017	0.195	1.050	7.000	0.013
1	2003Aug_Fin-01	Aug		18-Aug-03	20:51:36	4	38	79.43	8.60	9.24	1.782	11.2	8	78.20	6.879	84.00	70.60	10.31	0.130	7.811	0.0212	0.177	0.052	0.145	0.335	1.368	0.008
2	2003Aug_Fin-07	Aug		29-Aug-03	23:06:30	5	17	24.83	3.38	7.34	1.483	8.6	5	64.83	10.957	77.00	54.00	3.77	0.102	6.117	0.0577	0.183	0.018	0.114	0.254	1.080	0.018
8	2004Aug_Fin-01	Aug		28-Aug-04	14:30:36	5	56	31.31	5.78	5.41	2.068	7.3	3	58.15	33.029	87.00	10.60	8.42	0.091	5.471	0.0567	0.222	0.005	0.060	0.067	0.395	0.017
9	2004Aug_Fin-03	Aug		29-Aug-04	17:12:42	7	58	207.19	20.47	10.12	1.060	11.9	9	73.13	14.318	85.30	46.00	20.65	0.130	7.822	0.0550	0.207	0.013	0.230	0.889	5.255	0.013
10	2004Aug_Fin-02	Aug		30-Aug-04	7:02:36	15	96	149.68	38.45	3.89	3.102	10.8	1	43.08	36.908	88.60	0.10	38.88	0.101	6.034	0.0514	0.252	0.007	0.308	0.646	3.225	0.010
11	2004Aug_Fin-04	Aug	6	30-Aug-04	23:28:48	8	97	57.79	6.60	8.76	2.026	12.3	7	44.63	22.007	70.60	10.00	15.54	0.078	4.670	0.0518	0.217	0.005	0.083	0.091	0.533	0.007
3	2003Dec_Fin-01	Dec		4-Dec-03	21:41:30	11	55	73.07	11.44	6.39	2.544	9.2	3	78.45	27.752	96.00	4.00	13.65	0.183	11.005	0.0956	0.325	0.010	0.066	0.162	1.128	0.013
4	2003Dec_Fin-05	Dec		8-Dec-03	12:26:12	7	65	97.80	16.83	5.81	2.101	9.0	3	72.20	33.727	92.30	4.00	21.17	0.249	14.963	0.0689	0.363	0.022	0.078	0.202	1.607	0.017
75	2005Dec_Fin-02	Dec		12-Dec-05	3:52:18	6	27	49.10	3.83	12.81	3.750	18.5	9	25.96	18.230	42.30	1.00	5.24	0.073	4.381	0.0410	0.167	0.012	0.126	0.170	0.843	0.018
76	2005Dec_Fin-01	Dec		12-Dec-05	9:31:12	6	44	75.90	14.67	5.17	0.641	6.2	5	89.22	3.095	92.60	86.60	15.63	0.319	19.143	0.1078	0.490	0.033	0.037	0.010	0.055	0.013
77	2005Dec_Fin-03	Dec		13-Dec-05	15:34:54	4	36	51.35	9.43	5.44	2.755	8.6	4	55.57	7.488	64.00	49.70	10.26	0.159	9.547	0.1068	0.347	0.007	0.130	0.275	1.225	0.015
78	2005Dec_Fin-14	Dec		15-Dec-05	14:22:06	6	88	59.50	19.30	3.08	0.704	4.2	3	88.38	3.858	95.00	86.00	23.98	0.240	14.417	0.0432	0.338	0.103	0.033	0.010	0.092	0.018
79	2005Dec_Fin-17	Dec		16-Dec-05	7:19:12	5	24	28.48	6.40	4.45	1.609	6.2	2	85.05	9.164	95.00	76.30	8.37	0.299	17.963	0.0792	0.420	0.080	0.052	0.079	0.412	0.025
80	2005Dec_Fin-19	Dec		17-Dec-05	10:46:30	7	78	255.57	16.95	15.08	1.876	17.4	12	28.43	19.964	52.00	1.00	17.37	0.029	1.737	0.0359	0.208	0.005	0.197	0.554	3.873	0.007
81	2005Dec_Fin-21	Dec	9	19-Dec-05	12:36:24	7	43	96.72	5.75	16.82	2.309	19.3	13	15.98	5.752	22.60	6.00	6.12	0.026	1.549	0.0225	0.087	0.005	0.116	0.137	0.738	0.030
5	2004Feb_Fin-07	Feb		27-Feb-04	19:33:18	5	28	76.30	6.55	11.65	2.035	14.3	9	50.70	24.842	75.00	16.60	6.62	0.091	5.475	0.0483	0.175	0.005	0.164	0.189	0.775	0.030
95	2006Feb_Fin-01	Feb		26-Feb-06	11:59:42	13	102	137.91	26.22	5.26	2.050	8.6	2	51.88	32.124	85.70	1.00	26.23	0.132	7.911	0.0851	0.470	0.005	0.127	0.465	3.907	0.013
96	2006Feb_Fin-02	Feb		28-Feb-06	13:24:18	6	16	38.22	8.90	4.29	0.560	5.0	3	69.86	38.566	88.70	1.00	8.98	0.418	25.094	0.1175	0.542	0.080	0.153	0.354	1.430	0.042
97	2006Feb_Fin-05	Feb	4	28-Feb-06	21:23:48	6	23	61.59	6.77	9.10	5.211	14.1	3	62.14	30.446	95.70	35.70	6.80	0.153	9.196	0.1168	0.437	0.005	0.149	0.413	1.978	0.017
19	2005Jan_Fin-07	Jan		20-Jan-05	21:24:42	6	23	34.99	4.79	7.30	3.385	11.4	4	62.90	25.641	82.30	27.00	6.13	0.116	6.952	0.0526	0.287	0.005	0.158	0.474	2.178	0.012
82	2006Jan_Fin-02	Jan		20-Jan-06	7:29:00	4	37	73.95	9.30	7.95	0.742	8.8	8	84.10	8.906	91.70	74.30	12.90	0.236	14.157	0.0290	0.295	0.153	0.116	0.293	1.807	0.040
83	2006Jan_Fin-05	Jan		21-Jan-06	1:38:30	7	25	37.02	4.45	8.32	3.116	13.2	4	79.83	12.293	89.70	60.00	4.45	0.138	8.276	0.0741	0.250	0.007	0.035	0.016	0.095	0.012
84	2006Jan_Fin-03	Jan		21-Jan-06	7:43:12	8	72	31.74	15.93	1.99	1.312	4.4	1	86.43	6.302	92.70	74.00	15.98	0.194	11.626	0.0395	0.287	0.073	0.029	0.008	0.058	0.013
85	2006Jan_Fin-06	Jan		21-Jan-06	21:48:12	11	44	58.59	14.85	3.95	0.857	5.7	3	86.07	8.392	95.70	70.00	14.89	0.283	16.970	0.0736	0.402	0.103	0.057	0.101	0.590	0.018
86	2006Jan_Fin-12	Jan		23-Jan-06	8:43:42	6	25	35.30	8.08	4.37	0.983	5.7	3	68.26	37.796	89.30	1.00	9.83	0.305	18.296	0.0795	0.387	0.028	0.092	0.150	0.783	0.037
87	2006Jan_Fin-11	Jan		23-Jan-06	13:50:12	5	23	30.38	3.18	9.54	1.593	11.9	9	20.58	11.874	34.30	7.70	3.27	0.039	2.365	0.0540	0.267	0.005	0.108	0.109	0.512	0.025
88	2006Jan_Fin-14	Jan		24-Jan-06	7:30:18	8	59	52.61	14.22	3.70	1.876	7.9	1	74.67	29.019	92.00	1.00	14.30	0.227	13.642	0.0771	0.387	0.028	0.058	0.099	0.783	0.013
89	2006Jan_Fin-16	Jan		26-Jan-06	2:08:18	3	31	27.41	8.30	3.30	0.260	3.5	3	75.30	7.071	80.30	70.30	8.37	0.219	13.113	0.0261	0.250	0.155	0.053	0.016	0.122	0.028
90	2006Jan_Fin-18	Jan		26-Jan-06	22:49:48	15	42	129.33	25.28	5.12	1.178	7.0	4	48.58	43.615	93.00	1.00	25.65	0.296	17.752	0.0631	0.360	0.025	0.317	0.646	2.468	0.028
91	2006Jan_Fin-19	Jan		27-Jan-06	5:36:48	6	60	46.93	11.95	3.93	2.142	7.7	2	69.86	38.541	89.70	1.00	16.41	0.211	12.688	0.0662	0.315	0.022	0.063	0.208	1.628	0.020
92	2006Jan_Fin-22	Jan		27-Jan-06	16:20:12	4	47	47.23	14.30	3.30	0.367	3.7	3	87.67	7.538	92.70	79.00	15.91	0.282	16.902	0.0804	0.400	0.037	0.058	0.033	0.218	0.030
93	2006Jan_Fin-23	Jan		28-Jan-06	12:06:42	9	65	43.75	19.27	2.27	0.961	3.5	1	57.25	36.712	86.00	1.00	19.35	0.191	11.432	0.0808	0.333	0.025	0.105	0.365	2.752	0.013
94	2006Jan_Fin-26	Jan		29-Jan-06	17:54:06	8	46	59.22	13.13	4.51	1.617	7.5	3	72.63	31.857	87.30	1.00	13.17	0.203	12.178	0.0558	0.287	0.048	0.085	0.228	1.518	0.012
124	2007Jan_Fin-04	Jan		14-Jan-07	13:52:48	3	19	23.17	5.05	4.59	0.519	5.0	4	90.00	4.243	93.00	87.00	6.51	0.304	18.226	0.0487	0.362	0.130	0.041	0.011	0.063	0.028
125	2007Jan_Fin-05	Jan		15-Jan-07	7:46:24	28	88	358.89	39.65	9.05	5.889	22.6	0	48.24	38.727	93.60	0.10	39.73	0.243	14.605	0.1176	0.473	0.005	0.213	0.657	5.453	0.025
126	2007Jan_Fin-6	Jan		15-Jan-07	9:19:24	15	118	183.16	30.92	5.92	2.473	10.3	2	73.96	23.292	91.60	5.30	30.95	0.190	11.380	0.0728	0.337	0.013	0.073	0.161	1.708	0.027
127	2007Jan_Fin-11	Jan		16-Jan-07	9:26:42	6	32	34.91	16.40	2.13	0.589	2.8	1	69.10	35.432	90.00	6.00	16.31	0.422	25.316	0.0558	0.503	0.277	0.106	0.145	0.632	0.033
128	2007Jan_Fin-10	Jan		16-Jan-07	10:29:24	35	184	314.64	35.92	8.76	3.850	19.1	4	62.76	28.422	94.00	1.00	43.13	0.165	9.887	0.1064	0.362	0.005	0.070	0.122	1.168	0.015
129	2007Jan_Fin-12	Jan		17-Jan-07	10:10:12	7	28	38.96	12.49	3.12	1.143	5.0	2	85.13	6.928	89.60	71.60	12.52	0.381	22.886	0.0679	0.530	0.187	0.068	0.063	0.367	0.037
144	2008Jan_Fin-01	Jan		11-Jan-08	13:36:00	3	22	17.65	5.20	3.39	0.389	3.7	3	79.80	7.354	85.00	74.60	5.23	0.165	9.914	0.0677	0.412	0.063	0.076	0.056	0.280	0.030
145	2008Jan_Fin-02	Jan		12-Jan-08	6:34:06	6	30	22.80	14.12	1.61	1.338	3.9	0	71.96	37.791	92.60	4.60	14.37	0.309	18.570	0.1091	0.440	0.005	0.175	0.635	3.462	0.023
146	2008Jan_Fin-08	Jan		12-Jan-08	15:38:36	5	9	24.43	1.64	14.91	2.173	17.6	13	18.40	4.499	24.00	13.00	1.73	0.040	2.422	0.0291	0.100	0.018	0.171	0.171	0.385	0.025
147	2008Jan_Fin-05	Jan		12-Jan-08	16:51:54	7	16	38.82	4.06	9.57	2.348	12.3	6	28.13	16.344	45.30	5.60	4.23	0.092	5.531	0.1049	0.390	0.010	0.184	0.212	0.835	0.022
148	2008Jan_Fin-10	Jan		13-Jan-08	13:30:30	12	76	88.40	16.26	5.44	3.259	14.7	3	75.04	24.023	93.00	5.00	17.51	0.174	10.416	0.0557	0.322	0.037	0.058	0.134	1.080	0.020
149	2008Jan_Fin-12	Jan		13-Jan-08	20:02:54	8	17	28.39	7.32	3.88	0.956	5.3	3	75.16	34.320	95.60	1.30	7.36	0.338	20.276	0.0945	0.448	0.023	0.101	0.198	0.833	0.030
150	2008Jan_Fin-13	Jan		14-Jan-08	9:16:06	8	45	48.49	17.62	2.75	1.506	5.5	1	73.67	33.419	95.30	4.30	17.68	0.310	18.584	0.0711	0.420	0.078	0.085	0.198	1.303	0.017
151	2008Jan_Fin-11	Jan		14-Jan-08	17:58:54	18	68	72.72	31.78	2.29	1.109	4.6	0	67.18	37.196	94.30	1.60	33.02	0.272	16.319	0.1196	0.430	0.010	0.217	0.534	3.110	0.010
152	2008Jan_Fin-16	Jan		15-Jan-08	11:58:36	3	10	8.33	3.36	2.48	0.130	2.6	2	91.30	5.233	95.00	87.60	3.60	0.319	19.130	0.1510	0.447	0.033	0.046	0.016	0.078	0.025
153	2008Jan_Fin-17	Jan		16-Jan-08	4:07:06	15	35	101.68	18.17	5.60	1.523	8.6	4	54.25	33.364	94.10	0.10	18.18	0.360	21.623	0.0748	0.455	0.088	0.164	0.174	0.687	0.027
154	2008Jan_Fin-18	Jan		16-Jan-08	10:08:18	5	27	50.92	10.47	4.86	0.880	5.7	4	51.88	38.148	88.60	11.60	13.68	0.332	19.896	0.0873	0.467	0.058	0.182	0.460	2.233	0.013
155	2008Jan_Fin-20	Jan	32	18-Jan-08	3:36:30	4	14	29.19	5.24	5.57	1.059	6.8	5	84.30	5.700	90.00	78.60	6.10	0.376	22.579	0.0539	0.438	0.233	0.064	0.048	0.222	0.045
44	2005Jul_Fin-03	Jul		4-Jul-05	16:54:42	4	109	137.08	9.66	14.19	3.294	3.3	3	39.20	35.191	70.30	1.00	12.90	0.046	2.740	0.0366	0.037	0.037	0.073	0.141	0.141	0.141
45	2005Jul_Fin-05	Jul		5-Jul-05	17:30:30	3	15	46.49	4.37	10.64	3.633	3.6	4	9.15	2.616	11.00	7.30	4.57	0.015	0.927	0.0136	0.014	0.014	0.310	0.278	0.278	0.278
46	2005Jul_Fin-11	Jul		12-Jul-05	7:34:24	3	46	94.04	8.20	11.47	2.465	2.5	2	27.95	0.919	28.60	27.30	10.16	0.048	2.854	0.0425	0.042	0.042	0.177	0.309	0.309	0.309
47	2005Jul_Fin-12	Jul		13-Jul-05	2:44:42	7	35	168.87	20.30	8.32	1.999	2.0	2	33.23	42.458	89.30	1.00	20.41	0.096	5.760	0.0773	0.077	0.077	0.502	1.198	1.198	1.198
48	2005Jul_Fin-13	Jul		13-Jul-05	7:54:30	3	47	55.49	4.20	13.21	1.038	1.0	1	47.30	4.667	50.60	44.00	4.53	0.026	1.570	0.0186	0.019	0.019	0.072	0.058	0.058	0.058
49	2005Jul_Fin-14	Jul		13-Jul-05	14:39:48	7	78	150.83	18.33	8.23	1.169	1.2	1	37.22	22.194	65.00	1.00	19.41	0.091	5.451	0.0667	0.067	0.067	0.160	0.348	0.348	0.348
50	2005Jul_Fin-18	Jul	7	14-Jul-05	17:56:18	6	27	60.96	7.55	8.07	2.140	2.1	2	34.47	25.026	66.30	1.00	7.74	0.105	6.319	0.0918	0.092	0.092	0.188	0.238	0.238	0.238
110	2006Jun_Fin-04	Jun		3-Jun-06	5:22:48	3	14	19.78	8.08	2.45	1.856	1.9	2	34.07	38.679	76.60	1.00	8.30	0.067	3.993	0.0351	0.035	0.035	0.566	1.899	1.899	1.899
111	2006Jun_Fin-05	Jun	2	3-Jun-06	13:34:06	6	8	19.11	2.08	9.18	2.104	2.1	2	13.32	6.998	23.00	7.00	2.28	0.036	2.137	0.0142	0.014	0.014	0.285	0.207	0.207	0.207
6	2004Mar_Fin-08	02		2-Mar-04	22:42:18	11	69	167.38	26.14	6.40	4.416	13.8	2	27.84	26.577	88.00	1.00	28.11	0.157	9.397	0.1091	0.342	0.005	0.255	0.652	3.415	0.005
98	2006Feb_Fin-04	01		1-Mar-06	7:19:12	8	37	31.64	17.75	1.78	0.651	2.6	1	51.81	47.599	94.00	1.00	17.76	0.248	14.857	0.1072	0.430	0.010	0.239	0.742	3.857	0.020
99	2006Feb_Fin-03	01		1-Mar-06	7:40:06	12	66	69.26	34.60	2.00	0.622	2.9	1	40.31	45.225	92.70	1.00	34.65	0.204	12.217	0.1222	0.407	0.007	0.326	0.786	3.703	0.013
100	2006Mar_Fin-07	01		1-Mar-06	16:23:18	4	13	26.09	3.95	6.61	3.226	10.3	4	58.67	49.941	87.70	1.00	4.24	0.210	12.608	0.0694	0.327	0.087	0.125	0.190	0.698	0.025
101	2006Mar_Fin-11	02		2-Mar-06	18:38:36	4	12	6.90	2.40	2.87	1.377	4.2	1	40.67	43.817	87.70	1.00	2.44	0.120	7.225	0.0695	0.230	0.017	0.090	0.133	0.462	0.020
130	2007Mar_Fin-02	02		2-Mar-07	23:09:18	3	6	8.60	1.46	5.88	0.013	5.9	6	71.15	1.202	72.00	70.30	2.48	0.353	21.167	0.0274	0.380	0.303	0.072	0.046	0.140	0.025
131	2007Mar_Fin-03	03		3-Mar-07	12:05:12	3	29	24.01	5.03	4.77	0.519	5.1	4	84.50	2.121	86.00	83.00	6.63	0.203	12.207	0.0472	0.275	0.017	0.026	0.005	0.042	0.018
132	2007Mar_Fin-04	03		3-Mar-07	17:03:12	3	15	32.59	3.70	8.81	2.855	10.8	7	56.80	24.324	74.00	39.60	3.74	0.120	7.179	0.0797	0.275	0.038	0.126	0.114	0.308	0.027
102	2006Mar_Fin-12	04		4-Mar-06	8:39:42	6	15	54.06	14.58	3.71	2.726	6.8	1	15.14	31.618	71.70	1.00	14.66	0.237	14.213	0.1287	0.445	0.088	0.794	1.367	3.942	0.025
103	2006Mar_Fin-09	04		4-Mar-06	10:44:18	30	194	378.99	70.22	5.40	3.354	16.5	1	46.39	34.076	89.60	1.00	70.41	0.155	9.307	0.0827	0.353	0.005	0.209	0.652	5.115	0.017
133	2007Mar_Fin-06	04		4-Mar-07	11:25:18	9	48	78.68	7.25	10.85	2.555	15.8	8	37.60	21.992	65.30	1.00	7.31	0.068	4.068	0.0662	0.343	0.013	0.085	0.084	0.505	0.017
134	2007Mar_Fin-08	04		4-Mar-07	14:17:30	13	59	128.25	17.26	7.43	3.818	13.9	4	53.66	31.917	91.30	1.00	17.32	0.158	9.500	0.1337	0.412	0.005	0.136	0.263	1.592	0.018
104	2006Mar_Fin-14	05		5-Mar-06	18:14:48	3	16	13.02	1.10	11.84	3.763	14.5	9	33.20	16.263	44.70	21.70	1.25	0.024	1.469	0.0248	0.112	0.005	0.057	0.023	0.103	0.022
135	2007Mar_Fin-07	05		5-Mar-07	3:46:36	6	39	44.08	8.28	5.32	1.456	7.5	4	85.42	5.897	89.60	75.00	8.32	0.183	10.997	0.0391	0.262	0.038	0.035	0.016	0.115	0.018
136	2007Mar_Fin-09	05		5-Mar-07	5:06:18	8	45	73.54	7.19	10.22	2.700	13.4	6	52.64	23.182	83.70	21.70	7.24	0.085	5.073	0.0571	0.258	0.012	0.076	0.061	0.267	0.015
137	2007Mar_Fin-05	05		5-Mar-07	12:25:24	39	120	364.66	42.78	8.52	3.496	15.8	3	49.07	35.134	94.00	1.00	43.03	0.147	8.813	0.0915	0.308	0.007	0.214	0.435	2.290	0.008
20	2005Mar_Fin-11	06		6-Mar-05	6:04:24	5	46	16.74	14.59	1.15	0.798	2.2	0	67.48	42.507	93.00	4.00	14.64	0.220	13.185	0.1016	0.375	0.035	0.101	0.410	2.788	0.018
21	2005Mar_Fin-08	06		6-Mar-05	13:37:12	26	64	266.50	26.06	10.22	5.771	20.7	2	29.50	27.118	86.60	0.70	26.81	0.095	5.698	0.0841	0.287	0.005	0.329	0.645	3.027	0.020
138	2007Mar_Fin-10	06		6-Mar-07	13:35:24	9	38	105.64	18.88	5.60	1.225	7.3	4	50.25	42.135	90.00	1.00	23.65	0.257	15.438	0.0682	0.358	0.012	0.375	1.181	6.867	0.020
139	2007Mar_Fin-11	06		6-Mar-07	18:36:00	15	112	190.66	18.34	10.39	3.513	17.8	6	45.06	29.100	76.70	1.00	19.37	0.082	4.891	0.0480	0.192	0.005	0.092	0.241	2.297	0.017
22	2005Mar_Fin-15	07		7-Mar-05	17:53:30	6	35	33.38	15.82	2.11	0.969	3.9	1	58.30	45.305	93.00	0.10	36.10	0.253	15.203	0.0646	0.358	0.013	0.216	0.777	4.548	0.033
23	2005Mar_Fin-10	07		7-Mar-05	18:49:24	25	90	154.61	38.89	3.98	3.249	13.4	0	43.18	41.102	94.30	0.10	39.58	0.188	11.292	0.1064	0.473	0.005	0.254	0.515	2.905	0.012
105	2006Mar_Fin-15	07		7-Mar-06	5:23:12	10	34	53.33	18.82	2.83	1.304	4.6	1	50.40	37.030	93.30	1.00	19.01	0.281	16.882	0.1194	0.402	0.050	0.296	0.869	4.947	0.022
106	2006Mar_Fin-17	07		7-Mar-06	15:04:36	8	53	82.75	24.28	3.41	2.831	7.0	0	30.14	41.493	90.30	1.00	24.73	0.199	11.969	0.1124	0.487	0.017	0.266	0.577	3.082	0.020
24	2005Mar_Fin-21	08		8-Mar-05	6:35:42	4	22	17.07	5.17	3.30	0.841	4.2	3	49.77	34.651	84.30	15.00	5.21	0.167	10.036	0.0848	0.335	0.042	0.073	0.086	0.423	0.025
25	2005Mar_Fin-23	08		8-Mar-05	7:01:06	3	15	6.91	2.28	3.03	0.130	3.1	3	63.30	23.617	80.00	46.60	2.31	0.085	5.087	0.0744	0.185	0.005	0.075	0.100	0.413	0.015
26	2005Mar_Fin-22	08		8-Mar-05	14:23:48	3	9	16.88	2.97	5.69	1.038	6.4	5	90.15	1.626	91.30	89.00	3.02	0.207	12.433	0.1087	0.303	0.010	0.144	0.198	0.622	0.043
27	2005Mar_Fin-20	08		8-Mar-05	16:27:12	4	10	19.93	4.46	4.47	2.444	7.2	2	53.20	44.323	88.00	3.30	4.54	0.254	15.260	0.1203	0.350	0.005	0.222	0.514	1.592	0.030
107	2006Mar_Fin-18	08		8-Mar-06	13:58:48	11	104	161.85	37.53	4.31	1.218	6.8	3	68.30	36.433	92.30	1.00	39.07	0.268	16.058	0.0594	0.512	0.070	0.109	0.252	1.530	0.022
108	2006Mar_Fin-19	08		8-Mar-06	17:53:18	6	47	43.34	4.10	10.57	0.968	11.6	9	53.72	13.046	69.00	40.00	4.25	0.052	3.123	0.0357	0.170	0.012	0.039	0.025	0.120	0.012
109	2006Mar_Fin-20	08		8-Mar-06	19:16:54	5	15	21.02	1.93	10.87	1.275	12.7	10	34.83	16.356	53.30	15.00	1.98	0.053	3.167	0.0281	0.090	0.013	0.085	0.074	0.250	0.023
28	2005Mar_Fin-16	09		9-Mar-05	14:41:00	17	87	121.18	44.02	2.75	1.492	6.6	1	46.85	40.213	92.30	0.10	44.06	0.188	11.276	0.0671	0.325	0.005	0.322	1.086	7.547	0.012
140	2007Mar_Fin-12	09		9-Mar-07	14:04:42	26	210	232.20	61.96	3.75	2.524	12.8	0	57.27	38.533	89.70	1.00	62.01	0.149	8.929	0.0446	0.253	0.017	0.145	0.776	10.102	0.013
29	2005Mar_Fin-31	10		10-Mar-05	7:27:42	6	25	42.69	9.86	4.33	0.381	4.8	4	30.76	33.598	70.00	1.30	9.88	0.137	8.192	0.1064	0.388	0.018	0.270	0.615	2.960	0.017
30	2005Mar_Fin-32	10		10-Mar-05	10:17:36	6	28	66.02	7.49	8.81	5.494	18.0	4	55.32	13.763	70.30	40.00	8.75	0.117	7.014	0.0766	0.345	0.013	0.203	0.409	1.892	0.005
31	2005Mar_Fin-33	10		10-Mar-05	16:22:30	5	18	35.81	8.97	3.99	2.727	7.9	2	65.28	42.154	90.60	2.60	7.10	0.300	17.978	0.1270	0.442	0.075	0.100	0.161	0.710	0.025
32	2005Mar_Fin-40	11		11-Mar-05	21:01:24	4	7	18.45	1.14	16.21	3.672	19.8	12	12.87	9.646	24.00	7.00	1.22	0.030	1.771	0.0111	0.042	0.013	0.169	0.172	0.473	0.018
33	2005Mar_Fin-44	12		12-Mar-05	6:36:24	6	25	38.47	6.20	6.20	3.126	9.5	1	38.16	32.135	88.60	2.70	6.26	0.138	8.292	0.1069	0.353	0.005	0.117	0.250	1.253	0.020
34	2005Mar_Fin-41	12		12-Mar-05	10:02:24	3	10	13.23	1.36	9.73	4.152	12.7	7	27.10	9.192	33.60	20.60	1.42	0.062	3.700	0.0175	0.092	0.042	0.094	0.040	0.172	0.033
35	2005Mar_Fin-49	13		13-Mar-05	2:09:12	3	11	9.55	2.31	4.13	2.206	5.7	3	51.95	29.204	72.60	31.30	2.36	0.122	7.291	0.0706	0.287	0.063	0.102	0.054	0.230	0.030
36	2005Mar_Fin-50	13		13-Mar-05	3:40:18	3	30	25.29	2.87	8.81	0.779	9.4	8	12.50	9.192	19.00	6.00	2.96	0.024	1.460	0.0310	0.143	0.005	0.077	0.064	0.257	0.007
37	2005Mar_Fin-53	13		13-Mar-05	17:40:18	7	22	45.98	3.45	13.33	1.716	15.4	11	29.40	9.559	41.60	17.00	3.47	0.043	2.578	0.0344	0.177	0.008	0.113	0.100	0.463	0.015
141	2007Mar_Fin-13	13		13-Mar-07	14:38:54	15	110	268.52	46.56	5.77	4.969	16.3	1	35.83	30.203	90.30	1.00	46.64	0.115	6.896	0.0697	0.275	0.013	0.292	0.993	6.508	0.013
142	2007Mar_Fin-14	14	44	14-Mar-07	13:21:54	23	105	125.62	42.67	2.94	1.629	8.1	1	42.85	38.207	93.30	1.00	42.79	0.163	9.792	0.0768	0.338	0.015	0.246	0.484	2.590	0.017
7	2004May_Fin-01	May		11-May-04	17:42:18	21	88	179.57	53.77	3.34	1.605	1.6	2	52.66	35.428	93.30	1.00	54.17	0.199	11.914	0.1150	0.115	0.115	0.422	0.725	0.725	0.725
38	2005May_Fin-01	May		20-May-05	13:05:00	16	136	322.64	45.47	7.10	3.007	3.0	3	21.81	15.637	55.00	1.00	45.54	0.026	1.548	0.0222	0.022	0.022	0.311	0.945	0.945	0.945
39	2005May_Fin-04	May		21-May-05	3:40:30	8	36	79.84	14.43	5.53	1.905	1.9	2	50.01	35.489	81.00	1.70	14.94	0.072	4.311	0.0604	0.060	0.060	0.353	0.945	0.945	0.945
40	2005May_Fin-07	May		21-May-05	17:53:18	3	7	7.78	1.51	5.14	0.519	1.0	1	41.15	24.254	58.30	24.00	1.62	0.116	6.957	0.0832	0.083	0.083	0.135	0.140	0.140	0.140
41	2005May_Fin-05	May		24-May-05	1:43:36	24	120	429.73	64.74	6.64	1.744	1.7	2	56.41	35.451	95.60	0.10	65.00	0.144	8.628	0.0926	0.093	0.093	0.401	1.845	1.845	1.845
42	2005May_Fin-14	May		25-May-05	18:41:18	4	14	25.88	3.33	7.77	2.478	2.5	2	68.63	29.788	87.60	34.30	3.37	0.110	6.593	0.0726	0.073	0.073	0.141	0.234	0.234	0.234
43	2005May_Fin-15	May	7	26-May-05	8:47:18	3	16	33.85	4.73	7.16	1.298	1.3	1	46.65	51.831	83.30	10.00	5.57	0.123	7.381	0.1079	0.108	0.108	0.240	0.769	0.769	0.769
13	2004Nov_Fin-01	Nov		5-Nov-04	16:56:30	6	59	48.35	22.72	2.13	0.905	3.7	1	86.02	6.522	93.60	79.30	24.67	0.350	20.978	0.1380	0.530	0.022	0.070	0.136	0.905	0.020
14	2004Nov_Fin-03	Nov		6-Nov-04	10:43:12	3	28	14.90	4.50	3.31	0.013	3.3	3	94.95	1.909	96.30	93.60	9.51	0.313	18.804	0.0473	0.388	0.183	0.027	0.007	0.042	0.015
15	2004Nov_Fin-05	Nov		7-Nov-04	9:08:48	11	92	132.24	24.85	5.32	2.080	7.9	1	83.04	10.249	91.00	55.60	25.71	0.224	13.464	0.0453	0.318	0.075	0.056	0.085	0.705	0.023
16	2004Nov_Fin-06	Nov		7-Nov-04	17:15:12	4	20	17.14	6.52	2.63	1.043	3.5	1	89.40	3.305	92.60	86.00	6.68	0.301	18.075	0.0644	0.388	0.110	0.034	0.008	0.050	0.017
17	2004Nov_Fin-07	Nov		8-Nov-04	3:16:00	9	65	41.96	19.26	2.18	0.654	3.3	1	89.93	2.491	93.30	87.00	19.72	0.257	15.428	0.0851	0.372	0.013	0.047	0.060	0.363	0.013
18	2004Nov_Fin-08	Nov	6	8-Nov-04	19:22:36	3	42	31.80	5.78	5.51	0.260	5.7	5	88.80	0.707	89.30	88.30	10.88	0.230	13.779	0.0271	0.292	0.188	0.030	0.005	0.042	0.017
143	2007Sep_Fin-01	Oct	1	1-Oct-07	9:56:18	30	217	414.57	67.13	6.18	2.882	14.3	1	54.33	37.861	87.30	1.00	67.20	0.162	9.700	0.0485	0.277	0.005	0.136	0.392	3.797	0.013
12	2004Sep_Fin-06	02		2-Sep-04	3:47:12	6	41	41.98	4.00	10.50	1.033	11.6	9	28.50	11.180	44.00	19.30	4.45	0.040	2.395	0.0369	0.183	0.005	0.070	0.071	0.322	0.007
112	2006Sep_Fin-01	06		6-Sep-06	23:49:42	3	30	38.12	4.62	8.26	0.260	8.4	8	65.00	20.789	79.70	50.30	4.64	0.108	6.483	0.0288	0.150	0.018	0.048	0.031	0.157	0.025
113	2006Sep_Fin-03	08		8-Sep-06	19:49:42	4	18	20.80	2.50	8.32	3.017	11.7	6	71.57	14.123	80.70	55.30	2.97	0.114	6.850	0.0631	0.228	0.033	0.054	0.060	0.257	0.013
51	2005Sep_Fin-01	12		12-Sep-05	2:06:48	4	79	85.89	11.80	7.28	0.764	7.9	6	71.60	32.000	94.30	35.00	14.13	0.131	7.848	0.0547	0.263	0.012	0.049	0.049	0.325	0.018
52	2005Sep_Fin-02	12		12-Sep-05	13:05:42	4	39	43.56	6.53	6.67	2.242	8.6	4	33.80	20.016	46.00	10.70	7.20	0.052	3.138	0.0474	0.208	0.005	0.110	0.243	1.625	0.015
114	2006Sep_Fin-07	12		12-Sep-06	13:20:18	3	18	22.82	3.03	7.52	0.519	7.9	7	74.35	4.738	77.70	71.00	3.64	0.157	9.428	0.0550	0.208	0.017	0.048	0.028	0.112	0.018
53	2005Sep_Fin-04	14		14-Sep-05	14:26:00	4	46	98.96	6.15	16.09	3.726	20.4	14	11.10	7.716	20.00	6.30	8.97	0.017	1.000	0.0164	0.075	0.005	0.183	0.364	1.922	0.020
54	2005Sep_Fin-05	14		14-Sep-05	20:00:30	9	58	217.51	21.85	9.95	2.133	12.1	7	22.26	23.505	71.70	1.00	23.71	0.128	7.709	0.0939	0.318	0.005	0.285	0.656	2.982	0.012
115	2006Sep_Fin-09	14		14-Sep-06	1:22:06	4	25	30.07	5.02	5.99	1.856	7.2	4	57.57	31.679	76.70	21.00	5.58	0.111	6.636	0.0776	0.240	0.007	0.118	0.100	0.370	0.025
116	2006Sep_Fin-08	14		14-Sep-06	7:09:54	11	56	93.87	11.60	8.09	2.911	13.9	5	76.28	8.358	86.30	63.70	13.71	0.184	11.061	0.0832	0.290	0.012	0.062	0.078	0.592	0.017
55	2005Sep_Fin-06	15		15-Sep-05	18:50:24	7	32	48.18	5.23	9.21	3.866	13.6	4	40.62	31.053	76.30	1.00	5.26	0.090	5.391	0.0593	0.197	0.005	0.077	0.108	0.570	0.003
117	2006Sep_Fin-10	15		15-Sep-06	15:11:24	3	31	10.21	6.55	1.56	1.168	2.4	1	90.50	0.707	91.00	90.00	6.62	0.188	11.290	0.0450	0.253	0.023	0.026	0.006	0.040	0.017
56	2005Sep_Fin-07	16		16-Sep-05	12:31:12	3	16	23.85	4.33	5.51	1.038	6.2	5	75.15	7.283	80.30	70.00	4.57	0.146	8.781	0.0768	0.283	0.022	0.149	0.284	1.078	0.020
57	2005Sep_Fin-08	16		16-Sep-05	17:06:18	3	10	9.25	1.25	7.40	1.222	8.8	7	66.33	24.550	84.00	38.30	1.45	0.116	6.940	0.0461	0.163	0.018	0.033	0.011	0.050	0.013
58	2005Sep_Fin-09	17		17-Sep-05	5:14:06	3	6	25.31	4.27	5.93	1.744	7.7	4	36.63	34.356	76.30	16.30	4.44	0.168	10.050	0.0440	0.215	0.087	0.688	1.154	2.722	0.022
59	2005Sep_Fin-11	17		17-Sep-05	7:43:36	3	24	14.74	5.95	2.48	0.130	2.6	2	87.85	4.031	90.70	85.00	6.21	0.228	13.667	0.0847	0.350	0.025	0.033	0.015	0.095	0.017
60	2005Sep_Fin-10	17		17-Sep-05	14:10:42	11	74	95.42	15.25	6.26	1.194	7.3	3	70.10	31.636	88.70	1.00	15.66	0.141	8.482	0.0539	0.233	0.008	0.071	0.286	2.453	0.017
61	2005Sep_Fin-14	17		17-Sep-05	16:21:12	3	33	44.51	5.22	8.53	5.060	12.1	5	46.20	0.707	46.70	45.70	5.29	0.066	3.958	0.0686	0.233	0.005	0.097	0.116	0.482	0.012
118	2006Sep_Fin-11	17		17-Sep-06	15:27:36	19	223	316.22	43.38	7.29	2.158	11.7	3	73.68	21.596	87.60	1.00	46.25	0.160	9.587	0.0401	0.275	0.033	0.048	0.107	1.460	0.007
62	2005Sep_Fin-15	18		18-Sep-05	8:49:06	6	60	45.35	16.70	2.72	1.694	5.7	1	65.34	37.013	91.00	1.00	16.78	0.194	11.667	0.0740	0.318	0.010	0.087	0.284	2.158	0.020
119	2006Sep_Fin-12	18		18-Sep-06	3:04:36	3	67	83.68	9.50	8.81	0.779	9.4	8	80.50	5.374	84.30	76.70	13.06	0.132	7.891	0.0473	0.197	0.018	0.064	0.075	0.443	0.018
120	2006Sep_Fin-13	18		18-Sep-06	12:37:36	5	26	76.57	9.48	8.07	1.236	9.5	7	38.75	29.750	71.70	1.00	9.51	0.092	5.515	0.0436	0.207	0.027	0.285	0.600	2.675	0.027
121	2006Sep_Fin-14	18		18-Sep-06	15:49:06	4	13	47.36	6.73	7.03	1.180	7.9	6	67.77	24.463	88.30	40.70	8.28	0.219	13.154	0.0817	0.313	0.077	0.452	1.214	4.267	0.033
122	2006Sep_Fin-15	19		19-Sep-06	6:00:12	18	117	250.92	37.43	6.70	3.084	12.7	2	63.28	36.419	94.30	1.00	37.52	0.220	13.213	0.0674	0.367	0.062	0.101	0.304	2.223	0.020
63	2005Sep_Fin-16	20		20-Sep-05	18:36:48	6	31	62.39	8.33	7.49	1.772	9.5	6	40.00	35.960	73.30	1.00	8.37	0.114	6.819	0.0486	0.187	0.018	0.162	0.492	2.648	0.025
64	2005Sep_Fin-19	21		21-Sep-05	15:55:36	4	32	29.77	3.27	9.11	1.744	10.8	7	39.40	13.173	54.60	31.30	4.10	0.069	4.116	0.0321	0.137	0.005	0.061	0.059	0.290	0.022
65	2005Sep_Fin-18	21		21-Sep-05	20:09:18	3	24	93.87	13.12	7.16	0.519	7.5	7	47.50	3.111	49.70	45.30	13.26	0.097	5.825	0.0573	0.200	0.008	0.475	1.319	5.967	0.017
123	2006Sep_Fin-17	21		21-Sep-06	7:32:48	8	37	86.00	10.32	8.34	2.513	12.5	5	39.76	27.544	72.00	7.30	12.13	0.160	9.619	0.0715	0.350	0.027	0.172	0.204	1.055	0.033
66	2005Sep_Fin-20	22		22-Sep-05	11:39:30	9	30	132.57	16.85	7.87	2.136	11.0	5	24.38	32.579	73.00	1.00	16.79	0.197	11.850	0.0759	0.303	0.042	0.375	0.706	2.377	0.013
67	2005Sep_Fin-21	23		23-Sep-05	4:44:24	17	124	236.56	34.78	6.80	3.557	15.4	3	46.37	31.342	85.30	1.00	34.83	0.138	8.273	0.0886	0.345	0.005	0.144	0.354	3.037	0.008
68	2005Sep_Fin-22	23		23-Sep-05	11:11:06	4	30	36.89	3.70	9.97	2.338	12.7	8	66.37	10.693	75.70	54.70	4.35	0.084	5.053	0.0547	0.245	0.013	0.063	0.077	0.387	0.012
69	2005Sep_Fin-23	23		23-Sep-05	12:26:24	3	18	15.51	1.08	14.31	1.038	15.0	14	16.50	0.707	17.00	16.00	1.11	0.011	0.683	0.0105	0.033	0.005	0.054	0.037	0.138	0.007
70	2005Sep_Fin-24	24		24-Sep-05	5:29:30	4	20	96.27	6.93	13.88	1.425	15.0	12	16.00	18.520	36.70	1.00	6.97	0.040	2.405	0.0419	0.130	0.005	0.325	0.825	3.665	0.012
71	2005Sep_Fin-26	24		24-Sep-05	7:31:18	3	20	17.77	1.17	15.23	2.076	16.7	14	14.85	4.031	17.70	12.00	2.44	0.024	1.450	0.0207	0.067	0.005	0.103	0.080	0.282	0.020
72	2005Sep_Fin-27	24		24-Sep-05	9:07:48	8	79	55.97	16.55	3.38	2.043	6.1	1	45.74	33.380	81.30	1.00	17.58	0.111	6.658	0.0458	0.172	0.005	0.109	0.393	3.272	0.018
73	2005Sep_Fin-28	25		25-Sep-05	9:39:12	5	64	60.11	15.60	3.85	2.520	7.2	1	53.90	35.364	88.30	18.30	15.64	0.112	6.709	0.0451	0.188	0.018	0.135	0.408	2.777	0.017
74	2005Sep_Fin-25	25	26	25-Sep-05	16:19:18	20	103	272.50	32.57	8.37	3.493	15.4	3	45.36	33.908	87.70	1.00	33.10	0.122	7.345	0.0970	0.357	0.005	0.201	0.474	2.992	0.015
Track #	Unique Whale ID		152.00	Start Date	Start Time	Number of Positions	Number of Songs	Track Length (km)	Track Duration (h)	Mean Track Speed (kph)	Speed s.d. (kph)	Max. Speed (kph)	Min. Speed (kph)	Mean Track DC (%)	DC s.d. (%)	Max DC (%)	Min DC (%)	Total Singing Duration (h)	Mean Song Duration (h)	Mean Song Duration (min)	Song Duration s.d. (h)	Max. Song Duration (h)	Min. Song Duration (h)	Mean Inter-song Gap (h)	Inter-song Gap s.d. (h)	Max. Song Gap (h)	Min. Song Gap (h)
					Mean	8.4	49.2	86.2	14.9	6.7	1.9	8.7	4.1	54.3	23.4	77.3	23.7	15.8	0.16	9.78	0.07	0.28	0.04	0.16	0.36	1.69	0.08
					s.d.	7.06	41.54	89.75	14.71	3.41	1.22	4.9	3.2	21.85	14.14	21.0	30.1	14.83	0.093	5.578	0.0302	0.128	0.050	0.135	0.387	1.859	0.259
					Max	39.00	223	430	70.2	16.8	5.89	23	13.8	95	51.83	96.30	93.6	70.4	0.422	25.316	0.1510	0.542	0.303	0.794	1.899	10.102	1.899
					Min	3.00	6	7	1.1	1.1	0.01	1.0	1	9.2	0.71	11	0.00	1.1	0.011	0.683	0.0105	0.014	0.005	0.026	0.005	0.040	0.003
					Median	6.00	36	51	9.30	6.2	1.74	7.89	3.30	53.72	25.03	86.60	6.00	10.3	0.15	8.929	0.07	0.29	0.02	0.117	0.208	0.945	0.02
					SEM	0.55	3.25	7.03	1.15	0.27	0.10	0.39	0.25	1.71	1.11	1.64	2.36	1.16	0.01	0.437	0.00	0.01	0.00	0.011	0.030	0.146	0.02
